# Supplementary material for: Conversion of Mixtures of Soybean Curd Residue and Kitchen Waste by Black Soldier Fly Larvae (Hermetia illucens L.)
Source: MDPI journal article supplement (doi:10.3390/insects13010023), 2021-12-24
Supplement: s1 [file s1]

**Table S1.** Crude protein and crude fat of BSFL fed on soybean curd residue and kitchen waste and their co-digestion mixtures.

| Mixed organics | Larval protein content     | Larval fat content         | Other compounds           |
|----------------|----------------------------|----------------------------|---------------------------|
| M0             | 44.17 ± 1.26 <sup>ab</sup> | 32.71 ± 0.94 <sup>c</sup>  | 23.12 ± 0.68 <sup>b</sup> |
| M20            | 44.65 ± 1.68 <sup>a</sup>  | 34.76 ± 0.69 <sup>ab</sup> | 20.59 ± 0.92 <sup>d</sup> |
| M30            | 44.50 ± 1.52 <sup>a</sup>  | 35.00 ± 1.35 <sup>a</sup>  | 20.50 ± 1.14 <sup>d</sup> |
| M40            | 43.15 ± 1.36 <sup>b</sup>  | 33.49 ± 1.12 <sup>b</sup>  | 23.36 ± 0.94 <sup>b</sup> |
| M50            | 43.27 ± 0.87 <sup>b</sup>  | 34.86 ± 0.98 <sup>a</sup>  | 21.87 ± 0.58 <sup>c</sup> |
| M100           | 42.91 ± 1.23 <sup>c</sup>  | 31.50 ± 0.67 <sup>d</sup>  | 25.59 ± 0.79 <sup>a</sup> |

Six feed mixtures of SCR:KW were formulated: (0:100) M0, (20:80) M20, (30:70) M30, (40:60) M40, (50:50) M50, (100:0) M100. (Average ± SE; *n* = 3). Average values followed by the same letters within a column do not differ significantly (*p* < 0.05).
